# Supplementary material for: Factors Associated With Cognitive Improvement After Bariatric Surgery Among Patients With Severe Obesity in the Netherlands
Source: PubMed Central journal article supplement (PMC10230316; doi:10.1001/jamanetworkopen.2023.15936), 2023-05-30
Supplement: jamanetwopen-e2315936-s001.pdf [file jamanetwopen-e2315936-s001.pdf]

## Supplementary Online Content

Vreeken D, Seidel F, Custers EM, et al. Factors associated with cognitive improvement after bariatric surgery among patients with severe obesity in the Netherlands. *JAMA Netw Open*. 2023;6(5):e2315936. doi:10.1001/jamanetworkopen.2023.15936

**eTable 1.** Baseline Characteristics and Cognitive Test Scores of Improvers and Non-improvers

**eFigure 1.** Flow Chart of the Study

**eTable 2.** Missing Data per Outcome Measure at Baseline and 6 Months After Bariatric Surgery

**eTable 3.** Plasma Concentrations of Adipokines and Inflammatory Markers Before and 6 Months After Bariatric Surgery

**eFigure 2.** Boxplots With Cognitive Outcomes Before and 6 Months After Bariatric Surgery (A-E)

**eFigure 3.** Boxplots With Plasma Concentrations of Adipokines and Inflammatory Markers per Group (Improvers and Non-improvers) Before and 6 Months After Bariatric Surgery (A-C)

**eTable 4.** Pearson and Spearman Correlation Coefficients Between Changes in Cognition and Changes in Anthropometric Measures, Plasma Levels, Mood and Physical Activity

This supplementary material has been provided by the authors to give readers additional information about their work.

**eTable 1.** Baseline Characteristics and Cognitive Test Scores of Improvers and Non-improvers

|                                                           | <b>Improvers<br/>(n=57)</b> | <b>Non-improvers<br/>(n=73)</b> | <b>t/Chi-<br/>square</b> | <b>p-<br/>value</b> |
|-----------------------------------------------------------|-----------------------------|---------------------------------|--------------------------|---------------------|
| <b>Baseline characteristics</b>                           |                             |                                 |                          |                     |
| Age, mean ± SD (y)                                        | 45.4 ± 5.6                  | 46.2 ± 5.8                      | 0.72                     | 0.47                |
| Sex, women, n (%)                                         | 46 (80.7%)                  | 64 (87.7%)                      | 1.19                     | 0.27                |
| Level of education, n (%)                                 |                             |                                 |                          |                     |
| Low                                                       | 4                           | 6                               | 3.28                     | 0.19                |
| Middle                                                    | 37                          | 36                              |                          |                     |
| High                                                      | 16                          | 31                              |                          |                     |
| <b>Cognition, mean ± SD</b>                               |                             |                                 |                          |                     |
| <b>Digit Span (sum of Forward, Backward and Sorting)</b>  | 24.5 ± 4.3                  | 27.4 ± 4.9                      | <u>3.44</u>              | <u>&lt;0.001</u>    |
| <b>Story Recall (sum of immediate and delayed recall)</b> | 14.9 ± 6.4                  | 18.8 ± 5.3                      | <u>4.28</u>              | <u>&lt;0.001</u>    |
| <b>COWAT</b>                                              | 34.1 ± 10.2                 | 40.6 ± 10.1                     | <u>3.62</u>              | <u>&lt;0.001</u>    |
| <b>TAP Flexibility index score</b>                        | -4.5 ± 8.3                  | -1.6 ± 8.0                      | <u>2.02</u>              | <u>&lt;0.05</u>     |
| <b>Compound Z-score</b>                                   | -0.29 ± 0.59                | 0.26 ± 0.64                     | <u>5.09</u>              | <u>&lt;0.001</u>    |

P-value of difference between improvers and non-improvers based on independent sample t-test or chi-square. Significant changes between groups are indicated by underscoring the F/Z values and corresponding p-values. Abbreviations: COWAT = Controlled Oral Word Association Test, TAP = Tests of Attentional Performance.

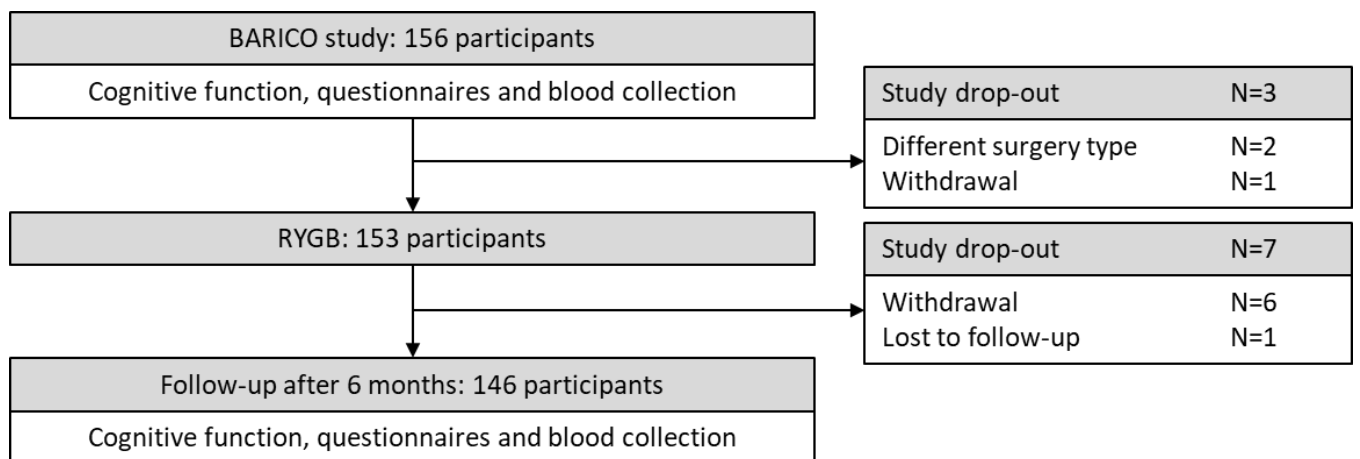

**eFigure 1. Flow Chart of the Study. 156 participants were recruited and underwent baseline measurements.**

In total, 146 participants underwent baseline and 6 months follow-up measurements including neuropsychological testing, questionnaires and blood collection. Abbreviations: RYGB = Roux-en-Y gastric bypass. eTable 2 shows more information on the missings per outcome measure.

**eTable 2.** Missing Data per Outcome Measure at Baseline and 6 Months After Bariatric Surgery

| Outcome measure                    | Number of missings (%) |            |
|------------------------------------|------------------------|------------|
|                                    | Baseline               | 6 months   |
| <b>WC<sup>a</sup></b>              | 14 (9.6%)              | 25 (17.1%) |
| <b>Blood pressure<sup>a</sup></b>  | 0 (0%)                 | 31 (21.2%) |
| <b>Plasma markers</b>              |                        |            |
| CRP                                | 16 (11.0%)             | 5 (3.4%)   |
| Leptin                             | 16 (11.0%)             | 16 (11.0%) |
| Adiponectin                        | 16 (11.0%)             | 15 (10.3%) |
| SAA                                | 17 (11.6%)             | 5 (3.4%)   |
| TNF- $\alpha$                      | 16 (11.0%)             | 5 (3.4%)   |
| IL- $\beta$                        | 17 (11.6%)             | 5 (3.4%)   |
| IL-6                               | 16 (11.0%)             | 5 (3.4%)   |
| PAI-1                              | 16 (11.0%)             | 5 (3.4%)   |
| <b>TAP Flexibility index score</b> | 7 (4.8%)               | 9 (6.2%)   |
| <b>BDI</b>                         | 4 (2.7%)               | 8 (5.5%)   |
| <b>Baecke<sup>b</sup></b>          | 13 (8.9%)              | 25 (17.1%) |

Only parameters with missing data are shown in the table. All other parameters did not contain any missing data on one of the two time points. <sup>a</sup> We had a lot of missing data for WC and blood pressure, as during the corona pandemic WC and blood pressure were not standard care anymore due to social distance. <sup>b</sup> Many patients did not fill in the complete questionnaire and therefore these data were not reliable and these scores were excluded. Abbreviations: WC = waist circumference, CRP = C-reactive protein, SAA = serum amyloid A, TNF- $\alpha$  = tumor necrosis factor alpha, IL-1 $\beta$  = interleukin-1 $\beta$ , IL-6 = interleukin-6, PAI-1 = plasminogen activator inhibitor 1, TAP = Tests of Attentional Performance, BDI-II = Beck Depression Inventory-Second Edition.

**eTable 3.** Plasma Concentrations of Adipokines and Inflammatory Markers Before and 6 Months After Bariatric Surgery

| <b>Plasma levels</b> | <b>Baseline<br/>(median (IQR))</b> | <b>6 months<br/>(median (IQR))</b> | <b>n</b> | <b>F/Z value</b> | <b>p-value</b> |
|----------------------|------------------------------------|------------------------------------|----------|------------------|----------------|
| CRP (µg/ml)          | 4.8 (2.8 – 9.3)                    | 1.4 (0.6 – 6.2)                    | 125      | 360.62           | <0.001         |
| Leptin (pg/ml)       | 65.4 (51.3 – 85.7)                 | 13.4 (8.5 - 22.9)                  | 115      | 1230.03          | <0.001         |
| Adiponectin (µg/ml)  | 2.3 (1.7 – 2.8)                    | 2.4 (1.9 – 3.1)                    | 115      | 16.62            | <0.001         |
| SAA (µg/ml)          | 7.1 (5.1 – 16.5)                   | 2.1 (1.1 – 4.0)                    | 124      | 363.19           | <0.001         |
| TNF-α (pg/ml)        | 3.9 (3.0 – 5.3)                    | 3.5 (2.8 – 4.2)                    | 125      | 13.29            | <0.001         |
| IL-1β (pg/ml)        | 0.18 (0.07 – 0.36)                 | 0.06 (0.00 – 0.20)                 | 124      | -4.62            | <0.001         |
| IL-6 (pg/ml)         | 2.1 (1.4 – 3.1)                    | 1.5 (1.0 – 2.1)                    | 125      | 24.05            | <0.001         |
| PAI-1 (ng/ml)        | 40.1 (29.8 – 57.2)                 | 29.6 (21.1 – 44.1)                 | 125      | 19.10            | <0.001         |

Repeated measures analyses of variance were conducted to examine changes of time. The difference over time for IL-1β is based on the Wilcoxon Signed Rank Test.

Abbreviations: CRP = C-reactive protein, SAA = serum amyloid A, TNF-α = tumor necrosis factor alpha, IL-1β = interleukin-1β, IL-6 = interleukin-6, PAI-1 = plasminogen activator inhibitor 1.

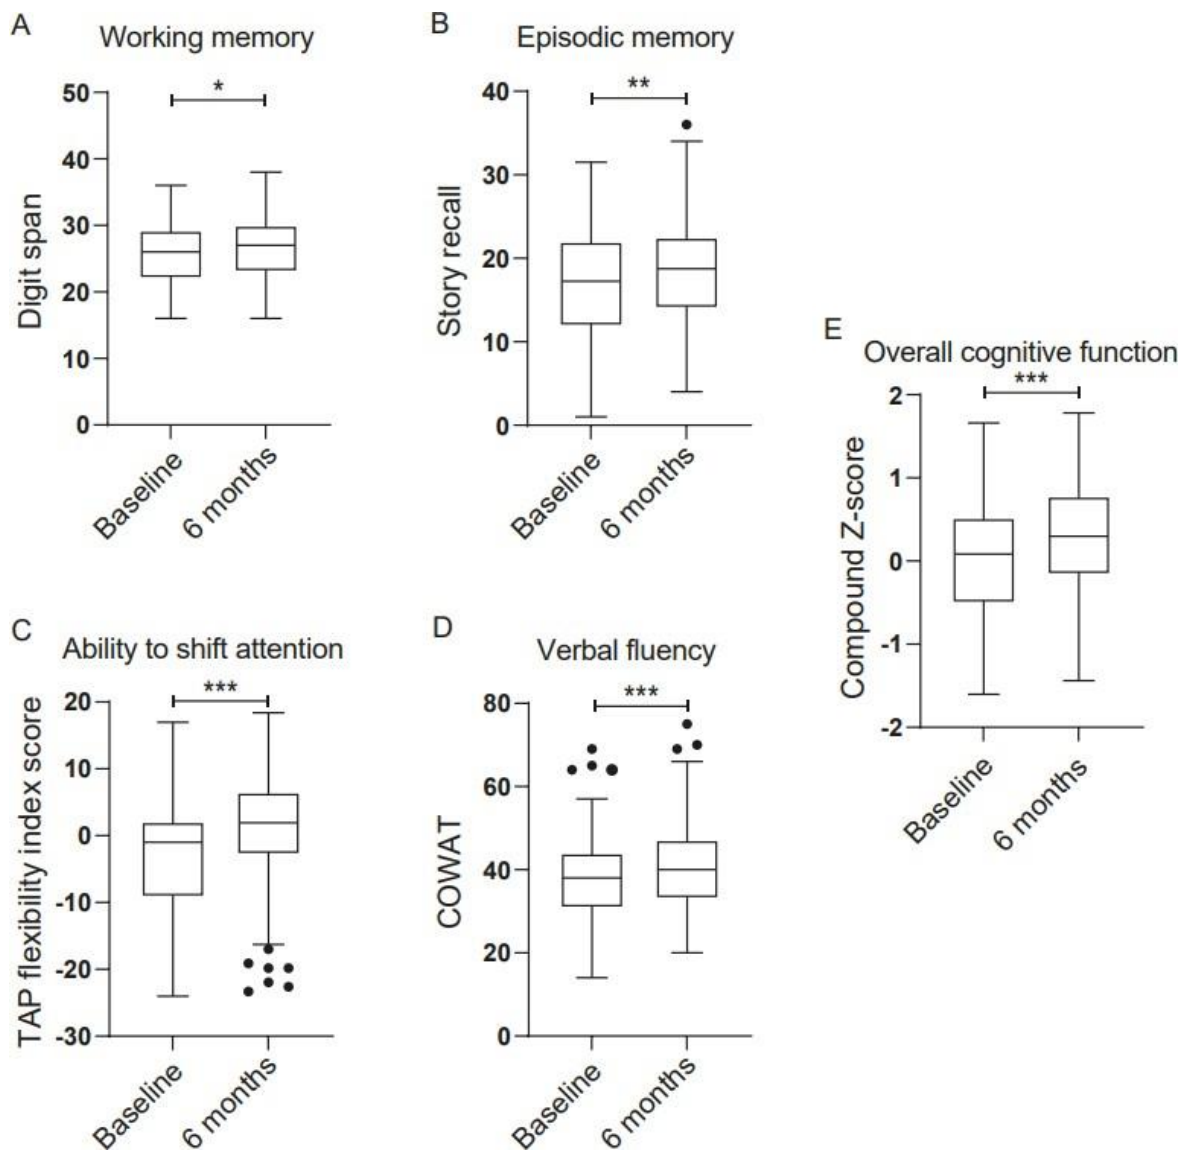

**eFigure 2.** Boxplots With Cognitive Outcomes Before and 6 Months After Bariatric Surgery (A-E)

Repeated measures analyses of variance were conducted to examine changes of time. \* $p < 0.05$ , \*\* $p < 0.01$ , \*\*\* $p < 0.001$ .

Data on both timepoints for the TAP flexibility index score (C) and Compound Z-score (E) were available for 130 participants.

Abbreviations: COWAT = Controlled Oral Word Association Test, TAP = Tests of Attentional Performance.

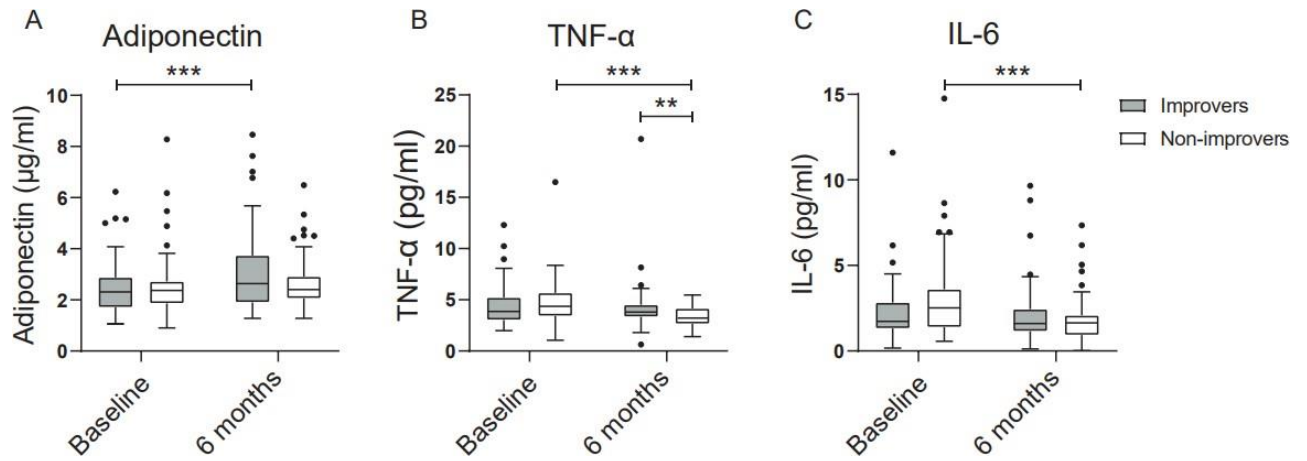

**eFigure 3.** Boxplots With Plasma Concentrations of Adipokines and Inflammatory Markers per Group (Improvers and Non-improvers) Before and 6 Months After Bariatric Surgery (A-C)

Repeated measures analyses of variance were conducted to examine changes of time and one-way analyses of variance were performed per timepoint to explore differences between improvers and non-improvers. \*\*p<0.01, \*\*\*p<0.001.

Abbreviations: TNF-α = tumor necrosis factor alpha, IL-6 = interleukin-6.

**eTable 4.** Pearson and Spearman Correlation Coefficients Between Changes in Cognition and Changes in Anthropometric Measures, Plasma Levels, Mood and Physical Activity

|                                          | <b>Delta Cognition</b>                                        |                                                             |       |                                      |                     |
|------------------------------------------|---------------------------------------------------------------|-------------------------------------------------------------|-------|--------------------------------------|---------------------|
|                                          | Digit Span<br>(sum of<br>Forward,<br>Backward and<br>Sorting) | Story Recall<br>(sum of<br>immediate and<br>delayed recall) | COWAT | TAP<br>Flexibility<br>index<br>score | Compound<br>Z-score |
| <b>Delta Anthropometric measurements</b> |                                                               |                                                             |       |                                      |                     |
| <b>BMI (kg/m<sup>2</sup>)</b>            | 0.01                                                          | -0.04                                                       | -0.11 | <u>0.21</u>                          | 0.06                |
| <b>WC (cm)</b>                           | 0.16                                                          | -0.02                                                       | -0.04 | <u>0.23</u>                          | 0.19                |
| <b>Delta Blood pressure</b>              |                                                               |                                                             |       |                                      |                     |
| <b>Systolic (mm HG)</b>                  | -0.17                                                         | -0.14                                                       | 0.02  | -0.12                                | -0.15               |
| <b>Diastolic (mm HG)</b>                 | -0.11                                                         | -0.05                                                       | 0.07  | -0.09                                | -0.07               |
| <b>Delta Plasma levels</b>               |                                                               |                                                             |       |                                      |                     |
| <b>CRP (µg/ml)</b>                       | 0.12                                                          | 0.02                                                        | 0.07  | 0.11                                 | 0.16                |
| <b>Leptin (pg/ml)</b>                    | 0.05                                                          | 0.05                                                        | 0.17  | 0.09                                 | 0.11                |
| <b>Adiponectin (µg/ml)</b>               | 0.17                                                          | 0.09                                                        | 0.10  | 0.01                                 | 0.17                |
| <b>SAA (µg/ml)</b>                       | 0.06                                                          | -0.03                                                       | 0.15  | 0.04                                 | 0.16                |
| <b>TNF-α (pg/ml)</b>                     | <u>0.18</u>                                                   | -0.02                                                       | 0.00  | 0.13                                 | 0.16                |
| <b>IL-1β (pg/ml)</b>                     | 0.02                                                          | -0.10                                                       | 0.15  | 0.04                                 | 0.04                |
| <b>IL-6 (pg/ml)</b>                      | 0.06                                                          | <u>0.18</u>                                                 | 0.03  | -0.08                                | 0.12                |
| <b>PAI-1 (ng/ml)</b>                     | -0.08                                                         | -0.06                                                       | -0.05 | 0.18                                 | 0.06                |
| <b>Delta BDI</b>                         | 0.01                                                          | -0.08                                                       | -0.13 | 0.01                                 | -0.11               |
| <b>Delta Baecke</b>                      | 0.06                                                          | 0.12                                                        | -0.07 | 0.00                                 | 0.05                |

Pearson correlation coefficients and spearman correlation coefficients for CRP, SAA and IL-1β. Significant correlations are indicated by underscoring these correlation coefficients, p<0.05.

Abbreviations: COWAT = Controlled Oral Word Association Test, TAP = Tests of Attentional Performance, CRP = C-reactive protein, SAA = serum amyloid A, TNF-α = tumor necrosis factor alpha, IL-1β = interleukin-1β, IL-6 = interleukin-6, PAI-1 = plasminogen activator inhibitor 1, BDI = Beck Depression Inventory.
