# Supplementary material for: Factors Associated With Cognitive Improvement After Bariatric Surgery Among Patients With Severe Obesity in the Netherlands
Source: PubMed Central journal article supplement (PMC10230316; doi:10.1001/jamanetworkopen.2023.15936), 2023-05-30
Supplement: jamanetwopen-e2315936-s002.pdf [file jamanetwopen-e2315936-s002.pdf]

## Data Sharing Statement

Vreeken. Factors Associated With Cognitive Improvement After Bariatric Surgery Among Patients With Severe Obesity in the Netherlands. *JAMA Netw Open*. Published May 30, 2023. doi:10.1001/jamanetworkopen.2023.15936

### Data

**Data available:** No

### Additional Information

**Explanation for why data not available:** De-identified data from the BARICO study will be made available upon request after approval by the study investigators.
